# Supplementary material for: Biomedical Indicators of Patients with Non-Puerperal Mastitis: A Retrospective Study
Source: MDPI journal article supplement (doi:10.3390/nu14224816), 2022-11-14
Supplement: s1 [file s1]

**Table S1. Baseline characteristics between non-puerperal mastitis and benign breast mass patients.**

| Variable                                   |       | Non-puerperal<br>mastitis (284) | Benign breast<br>mass (1128) | P-value |
|--------------------------------------------|-------|---------------------------------|------------------------------|---------|
| Age (years)                                |       | 35.6±9.8                        | 44.3±12.3                    | <0.001  |
| Menarche                                   | age   | 14.3±1.5                        | 14.6±1.5                     | 0.033   |
| (years) **                                 |       |                                 |                              |         |
| Childbearing history**                     |       |                                 |                              | 0.014   |
| Yes                                        |       | 250 (92.59 %)                   | 890 (87.17 %)                |         |
| No                                         |       | 20 (7.41 %)                     | 131 (12.83 %)                |         |
| Breastfeeding history**                    |       |                                 |                              | 0.025   |
| Yes                                        |       | 67 (80.72%)                     | 590 (89.12 %)                |         |
| No                                         |       | 16 (19.28%)                     | 72 (10.88 %)                 |         |
| The longest breastfeeding time (months) ** |       | 10 (6,12)                       | 10 (6,12)                    | 0.959   |
| M (25%, 75%)                               |       |                                 |                              |         |
| High                                       | blood |                                 |                              | 0.054   |
| pressure **                                |       |                                 |                              |         |
| Yes                                        |       | 17 (5.99 %)                     | 39 (3.48 %)                  |         |
| No                                         |       | 267 (94.01 %)                   | 1082 (96.52%)                |         |
| Diabetes mellitus**                        |       |                                 |                              | <0.001  |
| Yes                                        |       | 2 (0.70%)                       | 139 (12.39 %)                |         |
| No                                         |       | 282 (99.3%)                     | 983 (87.61 %)                |         |

\*\* Some data was missing.

**Table S2. Baseline characteristics of non-puerperal mastitis patients.**

| Variable           |         | Mammary duct<br>ectasia (150) | Granulomatous<br>Mastitis (38) | P-value |
|--------------------|---------|-------------------------------|--------------------------------|---------|
| Age (years)        |         | 36.2±9.8                      | 33.4±7.4                       | 0.1039  |
| Menarche           | age     | 14.4±1.6                      | 14.2±1.4                       | 0.4364  |
| (years) **         |         |                               |                                |         |
| Menstrual          |         |                               |                                | 0.091   |
| regularity**       |         |                               |                                |         |
| Yes                |         | 125                           | 33                             |         |
| No                 |         | 11                            | 0                              |         |
| Onset              | time    | 2.0 (0.7, 5.0)                | 2.0 (1.0, 3.0)                 | 0.6595  |
| (months)           |         |                               |                                |         |
| M (25%, 75%)       |         |                               |                                |         |
| Recurrence         |         |                               |                                | 0.896   |
| Yes                |         | 25                            | 6                              |         |
| No                 |         | 125                           | 32                             |         |
| Congenital nipple  |         |                               |                                | 0.034   |
| retraction**       |         |                               |                                |         |
| Yes                |         | 14                            | 1                              |         |
| No                 |         | 48                            | 25                             |         |
| Number             | of      | 2 (1, 2)                      | 2 (1, 2)                       | 0.9724  |
| pregnancy **       |         |                               |                                |         |
| M (25%, 75%)       |         |                               |                                |         |
| Number             | of      | 1 (1, 1)                      | 1 (1, 1)                       | 0.3187  |
| breastfeeding **   |         |                               |                                |         |
| M (25%, 75%)       |         |                               |                                |         |
| The                | longest | 11 (7, 12)                    | 12 (6, 12)                     | 0.9063  |
| breastfeeding time |         |                               |                                |         |
| (months) **        |         |                               |                                |         |
| M (25%, 75%)       |         |                               |                                |         |

|                                              |     |    |       |
|----------------------------------------------|-----|----|-------|
| Breastfeeding of<br>sick lateral<br>breast** |     |    | 0.442 |
| Yes                                          | 29  | 9  |       |
| No                                           | 1   | 1  |       |
| Breast mass<br>distribution                  |     |    | 0.845 |
| Left breast                                  | 69  | 20 |       |
| Right breast                                 | 75  | 17 |       |
| Bilateral breast                             | 6   | 1  |       |
| Quadrant of mass                             |     |    | 0.716 |
| Nodular or no<br>mass                        | 5   | 2  |       |
| Outer upper<br>quadrant                      | 42  | 9  |       |
| Outer lower<br>quadrant                      | 18  | 8  |       |
| Inner lower<br>quadrant                      | 8   | 3  |       |
| Inner upper<br>quadrant                      | 25  | 4  |       |
| Areola area                                  | 26  | 6  |       |
| Multiple<br>quadrants                        | 25  | 6  |       |
| High blood<br>pressure                       |     |    | 0.362 |
| Yes                                          | 8   | 0  |       |
| No                                           | 142 | 38 |       |
| Diabetes mellitus                            |     |    | 1.00  |

|     |     |    |
|-----|-----|----|
| Yes | 1   | 0  |
| No  | 149 | 38 |

---

\*\* Some data was missing.

**Table S3. Clinical, ultrasound features and treatment of non-puerperal mastitis patients.**

| Variable                         | Mammary duct<br>ectasia (150) | Granulomatous<br>Mastitis (38) | P-value |
|----------------------------------|-------------------------------|--------------------------------|---------|
| Epidermal redness**              |                               |                                | 0.261   |
| Yes                              | 44                            | 10                             |         |
| No                               | 51                            | 19                             |         |
| Edema**                          |                               |                                | 0.225   |
| Yes                              | 38                            | 8                              |         |
| No                               | 54                            | 20                             |         |
| Skin temperature<br>increasing** |                               |                                | 0.336   |
| Yes                              | 14                            | 2                              |         |
| No                               | 50                            | 18                             |         |
| Skin ulceration**                |                               |                                | 0.674   |
| Yes                              | 32                            | 11                             |         |
| No                               | 63                            | 18                             |         |
| Suppuration**                    |                               |                                | 0.074   |
| Yes                              | 25                            | 14                             |         |
| No                               | 65                            | 17                             |         |
| Mass boundary**                  |                               |                                |         |
| Clear                            | 19                            | 7                              | 0.148   |
| Unclear                          | 91                            | 16                             |         |
| Mass texture**                   |                               |                                | 0.67    |
| Soft                             | 47                            | 8                              |         |
| Hard                             | 67                            | 14                             |         |
| Mobility**                       |                               |                                | 0.132   |
| Good                             | 70                            | 18                             |         |
| Poor                             | 37                            | 4                              |         |

|                                   |     |    |       |
|-----------------------------------|-----|----|-------|
| Duct expansion**                  |     |    | 0.745 |
| Yes                               | 23  | 4  |       |
| No                                | 90  | 19 |       |
| Glander structure disorder**      |     |    | 0.145 |
| Yes                               | 68  | 11 |       |
| No                                | 38  | 12 |       |
| Axillary lymph node enlargement** |     |    | 0.935 |
| Yes                               | 28  | 6  |       |
| No                                | 76  | 17 |       |
| Antibiotic therapy**              |     |    | 0.088 |
| Yes                               | 76  | 21 |       |
| No                                | 44  | 5  |       |
| Operative treatment**             |     |    |       |
| Partial mastectomy                | 138 | 33 | 0.256 |
| Total mastectomy                  | 11  | 5  |       |

\*\* Some data was missing.
